# Supplementary material for: Comprehensive Detection of Isopeptides between Human Tissue Transglutaminase and Gluten Peptides
Source: MDPI journal article supplement (doi:10.3390/nu11102263), 2019-09-20
Supplement: s1 [file s1]

|             |             |            |            |             |
|-------------|-------------|------------|------------|-------------|
| 10          | 20          | 30         | 40         | 50          |
| MAEELVLERC  | DLELETNGRD  | HHTADLCREK | LVVRRGQPFW | LTLLHFEGRNY |
| 60          | 70          | 80         | 90         | 100         |
| EASVDSLTFSS | VVTGPAPSQE  | AGTKARFPLR | DAVEEGDWTG | TVVDQQDCTL  |
| 110         | 120         | 130        | 140        | 150         |
| SLQLTTPANA  | PIGLYRLSLE  | ASTGYQGSSF | VLGHFILLFN | AWCPADAVYL  |
| 160         | 170         | 180        | 190        | 200         |
| DSEEEERQ    | EYVLTQQGFYQ | SAKFIKNIPW | NFGQFEDGIL | DICLILLDVN  |
| 210         | 220         | 230        | 240        | 250         |
| PKFLKNAGRD  | CSRSSPVYV   | GRVVSGMVNC | NDDQGVLLGR | WDNNYGDGVS  |
| 260         | 270         | 280        | 290        | 300         |
| PMSWIGSVDI  | LRRWNHGCQ   | RVKYGQCWVF | AAVACTVLRC | LGIPTRVVTN  |
| 310         | 320         | 330        | 340        | 350         |
| YNSAHDQNSN  | LLIEYFRNEF  | GEIQGDKSEM | IWNFHCWVES | WMTRPDLQPG  |
| 360         | 370         | 380        | 390        | 400         |
| YEGWQALDPT  | PQEKSEGTYC  | CGPVPVRAIK | EGDLSTKYDA | PFVFAEVNAD  |
| 410         | 420         | 430        | 440        | 450         |
| VVDWIQQDDG  | SVHKSINRSL  | IVGLKISTKS | VGRDEREDIT | HTYKYPEGSS  |
| 460         | 470         | 480        | 490        | 500         |
| EEREAFTRAN  | HLNKLAEKEE  | TGMAMRIRVG | QSMNMGSGFD | VFAHITNNTA  |
| 510         | 520         | 530        | 540        | 550         |
| EEYVCRLLLC  | ARTVSYNGIL  | GPECGTKYLL | NLNLEPFSEK | SVPLCILYEK  |
| 560         | 570         | 580        | 590        | 600         |
| YRDCLTESNL  | IKVRALLVEP  | VINSYLLAER | DLYLENPEIK | IRILGEPKQK  |
| 610         | 620         | 630        | 640        | 650         |
| RKLVAEVSLO  | NPLPVALEGC  | TFTVEGAGLT | EEQKTVEIPD | PVEAGEEVKV  |
| 660         | 670         | 680        |            |             |
| RMDLLPLHMG  | LHKLVNFES   | DKLKAVKGFR | NVIIGPA    |             |

Supplementary Figure S2.

**Sequence coverage of TG2.** The analysis of all identified peptides of human tissue transglutaminase (TG2) resulted in a sequence coverage of 79.6 % (UniProtKB accession No. P21980).
