# Supplementary material for: Comprehensive Detection of Isopeptides between Human Tissue Transglutaminase and Gluten Peptides
Source: MDPI journal article supplement (doi:10.3390/nu11102263), 2019-09-20
Supplement: s1 [file s1]

Supplementary Figure S1

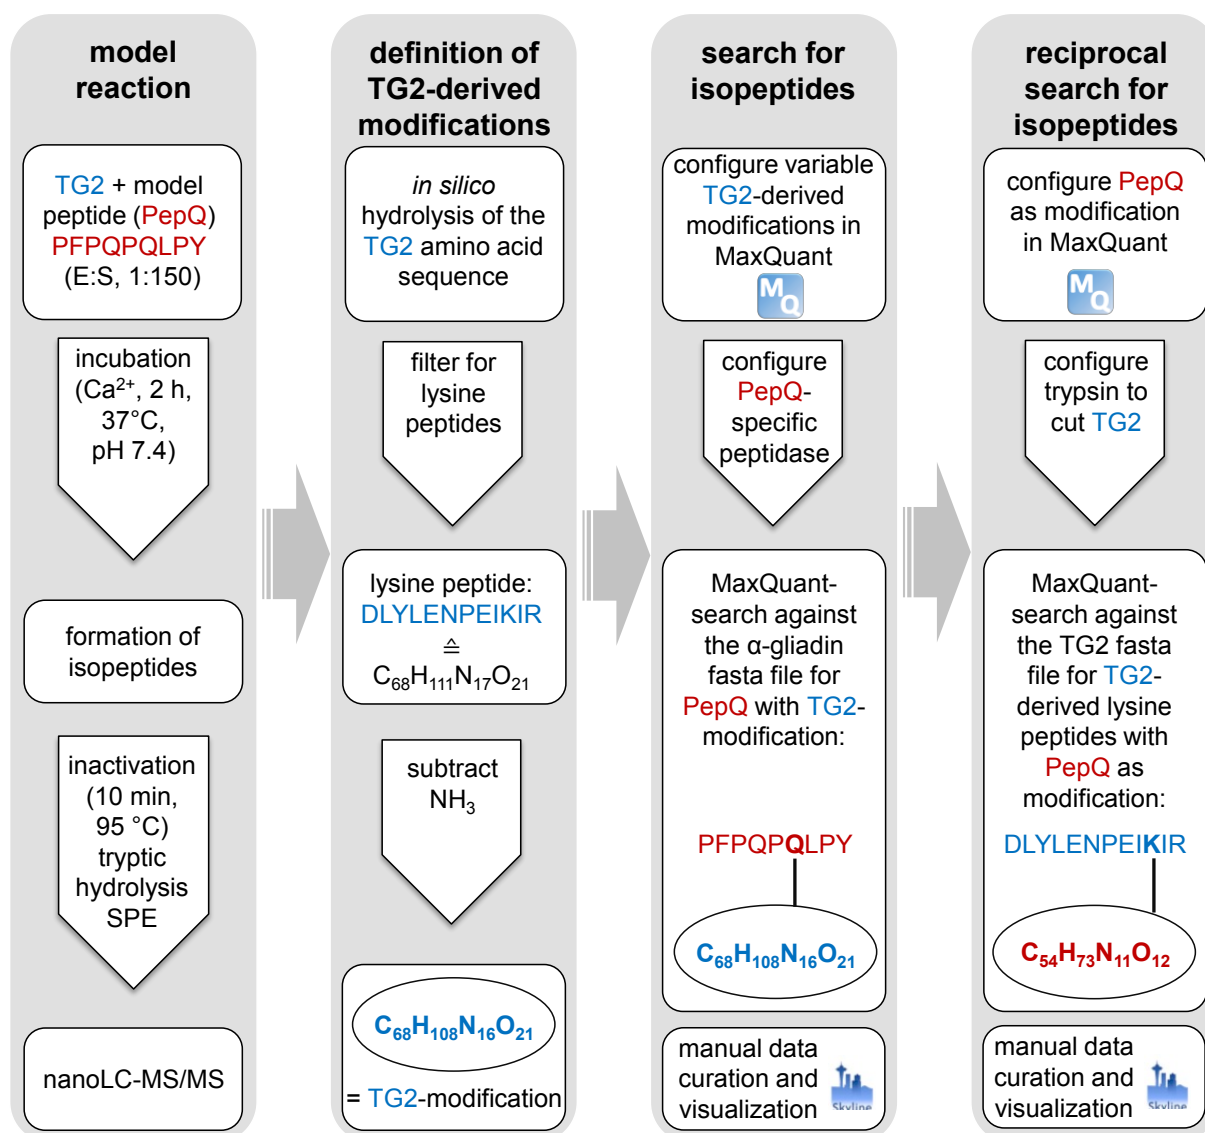

### Reciprocal search workflow to identify isopeptides with MaxQuant and Skyline.

The workflow consists of four steps: (1) model reaction between TG2 and gluten peptide(s) followed by tryptic hydrolysis, clean-up and untargeted nLC-MS/MS analysis, (2) definition of tryptic TG2-derived lysine peptides as potential isopeptide modification sites, (3) the search for isopeptides by configuring the TG2-modifications in MaxQuant and search against the  $\alpha$ -gliadin fasta file and (4) the reciprocal search for isopeptides by configuring the gluten peptide(s) as modification in MaxQuant and search against the TG2 fasta file.
