# Supplementary material for: Comprehensive Detection of Isopeptides between Human Tissue Transglutaminase and Gluten Peptides
Source: MDPI journal article supplement (doi:10.3390/nu11102263), 2019-09-20
Supplement: s1 [file s1]

|                                        |                                        |                                        |                         |                                       |
|----------------------------------------|----------------------------------------|----------------------------------------|-------------------------|---------------------------------------|
| 10                                     | 20                                     | 30                                     | 40                      | 50                                    |
| MAEELVLERC                             | DLELETNGRD                             | HHTADLCREK                             | LVVRRGQPFW              | LTLHFEGRNY                            |
| 60                                     | 70                                     | 80                                     | 90                      | 100                                   |
| EASVDSLTF                              | VVTGPAPSQE                             | AGTKARFPLR                             | DAVEEGDWT               | TVVDQQDCTL                            |
| 110                                    | 120                                    | 130                                    | 140                     | 150                                   |
| SLQLTTPANA                             | PIGLYRLSLE                             | ASTGYQGSSF                             | VLGHFILLFN              | AWCPADAVYL                            |
| 160                                    | 170                                    | 180                                    | 190                     | 200                                   |
| DSEERQYEV                              | LTQQGFIYQG                             | SAKFIKNIPW                             | NFGQFEDGIL              | DICLILLDVN                            |
| 210                                    | 220                                    | 230                                    | 240                     | 250                                   |
| PKFLK <sup>Y</sup> NAGRD               | CSRSSPVYV                              | GRVVS <sup>Y</sup> GMVNC               | NDDQGVLLGR              | WDNNYGDGVS                            |
| 260                                    | 270                                    | 280                                    | 290                     | 300                                   |
| PMSWIGSVDI                             | LRRW <sup>Y</sup> NHGCQ                | RVKYGCWVF                              | AAVACTVLRC              | LGIPTRVVTN                            |
| 310                                    | 320                                    | 330                                    | 340                     | 350                                   |
| YNSAHDQNSN                             | LLIEYFRNEF                             | GEIQGDKSEM                             | IWNFHCWVES              | WMTRPDLPQG                            |
| 360                                    | 370                                    | 380                                    | 390                     | 400                                   |
| YEGWQALDPT                             | PQEKSEGTYC                             | CGPVPVRAIK <sup>Y</sup>                | EGDLSTKYDA              | PFVFAEVNAD                            |
| 410                                    | 420                                    | 430                                    | 440                     | 450                                   |
| VVDWIIQDDG                             | SVHKSINRSL                             | IVGLK <sup>Y</sup> ISTK <sup>Y</sup>   | VGRDEREDIT              | HTYK <sup>Y</sup> PEGSS               |
| 460                                    | 470                                    | 480                                    | 490                     | 500                                   |
| EEREAFTRAN                             | HLN <sup>Y</sup> KLAEK <sup>Y</sup> EE | TGMAMRIRVG                             | QSMNMG <sup>Y</sup> SFD | VFAHITNNTA                            |
| 510                                    | 520                                    | 530                                    | 540                     | 550                                   |
| EEYVCRLLLC                             | ARTVSYNGIL                             | GPEC <sup>Y</sup> GTKYLL               | NLNLEPFSEK              | SVPLCILYK <sup>Y</sup>                |
| 560                                    | 570                                    | 580                                    | 590                     | 600                                   |
| YRDCLTESNL                             | IK <sup>Y</sup> VRALLVEP               | VINSYLLAER                             | DLYLENPEIK <sup>Y</sup> | IRILGEPK <sup>Y</sup> QK <sup>Y</sup> |
| 610                                    | 620                                    | 630                                    | 640                     | 650                                   |
| RK <sup>Y</sup> LVAEVS <sup>Y</sup> LQ | NPLPVALEGC                             | TFTVEGAGLT                             | EEQKTVEIPD              | PVEAGEEVK <sup>Y</sup> V              |
| 660                                    | 670                                    | 680                                    |                         |                                       |
| RMDLLPLHMG                             | LHK <sup>Y</sup> LVVNFES               | DKL <sup>Y</sup> KAVK <sup>Y</sup> GFR | NVIIGPA                 |                                       |

Supplementary Figure S4.

**Differentiation of the reactive sites of TG2.** The lysine residues involved in isopeptide formation are highlighted. The most preferred lysine residues are given in blue, the less preferred lysine residues are given in yellow and the least preferred lysine residues in violet. (UniProtKB accession No. P21980).
