# Supplementary material for: Comprehensive Detection of Isopeptides between Human Tissue Transglutaminase and Gluten Peptides
Source: MDPI journal article supplement (doi:10.3390/nu11102263), 2019-09-20
Supplement: s1 [file s1]

Supplementary Table S1

TG2 peptides containing lysine residues identified as isopeptide crosslinking sites

| Lysine No.       | Sequence of TG2 peptide   | Formula of the modification in<br>MaxQuant and Skyline <sup>a</sup>              | Modification<br>mass |
|------------------|---------------------------|----------------------------------------------------------------------------------|----------------------|
| 173              | QEYVLTQQGFIYQGSAKFI       | C <sub>110</sub> H <sub>163</sub> N <sub>25</sub> O <sub>31</sub>                | 2330.19              |
| 205              | FLKNAGR                   | C <sub>36</sub> H <sub>57</sub> N <sub>11</sub> O <sub>9</sub>                   | 787.43               |
| 265              | WKNHGCQR                  | C <sub>43</sub> H <sub>62</sub> N <sub>16</sub> O <sub>11</sub> S                | 1010.45              |
| 380              | AIKEGDLSTK                | C <sub>45</sub> H <sub>77</sub> N <sub>11</sub> O <sub>17</sub>                  | 1043.55              |
| 425              | SLIVGLKISTK               | C <sub>53</sub> H <sub>96</sub> N <sub>12</sub> O <sub>15</sub>                  | 1140.71              |
| 429              | ISTKSVGR                  | C <sub>35</sub> H <sub>63</sub> N <sub>11</sub> O <sub>12</sub>                  | 829.47               |
| 429              | ISTKSVGRDER               | C <sub>50</sub> H <sub>87</sub> N <sub>17</sub> O <sub>19</sub>                  | 1229.64              |
| 444              | EDITHTYKYPEGSSSEER        | C <sub>87</sub> H <sub>126</sub> N <sub>22</sub> O <sub>34</sub>                 | 2022.88              |
| 444              | DEREDITHTYKYPEGSSSEE      | C <sub>102</sub> H <sub>150</sub> N <sub>28</sub> O <sub>41</sub>                | 2423.05              |
| 464              | ANHLNKLAEKEETGMAM         | C <sub>84</sub> H <sub>140</sub> N <sub>26</sub> O <sub>28</sub> S <sub>2</sub>  | 2024.98              |
| 464              | ANHLNKLAEK                | C <sub>49</sub> H <sub>81</sub> N <sub>15</sub> O <sub>15</sub>                  | 1119.60              |
| 468              | LAEKEETGMAMR              | C <sub>55</sub> H <sub>93</sub> N <sub>15</sub> O <sub>20</sub> S <sub>2</sub>   | 1347.62              |
| 550              | SVPLCILYEKYR              | C <sub>68</sub> H <sub>107</sub> N <sub>15</sub> O <sub>18</sub> S               | 1453.76              |
| 562              | DCLTESNLIKVR              | C <sub>58</sub> H <sub>100</sub> N <sub>16</sub> O <sub>20</sub> S               | 1372.70              |
| 562              | YRDCLTESNLIKVR            | C <sub>73</sub> H <sub>121</sub> N <sub>21</sub> O <sub>23</sub> S               | 1691.87              |
| 590              | DLYLENPEIKIR              | C <sub>68</sub> H <sub>108</sub> N <sub>16</sub> O <sub>21</sub>                 | 1484.79              |
| 598              | ILGEPKQK                  | C <sub>41</sub> H <sub>70</sub> N <sub>10</sub> O <sub>12</sub>                  | 894.52               |
| 598              | ILGEPKQKR                 | C <sub>47</sub> H <sub>82</sub> N <sub>14</sub> O <sub>13</sub>                  | 1050.62              |
| 600              | QKR                       | C <sub>17</sub> H <sub>31</sub> N <sub>7</sub> O <sub>5</sub>                    | 413.24               |
| 600              | QKRK                      | C <sub>23</sub> H <sub>43</sub> N <sub>9</sub> O <sub>6</sub>                    | 541.33               |
| 602              | K                         | C <sub>6</sub> H <sub>11</sub> N <sub>1</sub> O <sub>2</sub>                     | 129.08               |
| 649              | TVEIPDPVEAGEEVKVR         | C <sub>81</sub> H <sub>132</sub> N <sub>20</sub> O <sub>29</sub>                 | 1848.94              |
| 663              | MDLLPLHMGLHKLNVNF         | C <sub>122</sub> H <sub>198</sub> N <sub>30</sub> O <sub>32</sub> S <sub>2</sub> | 2659.42              |
| 672              | LVVNFESDKLK               | C <sub>59</sub> H <sub>95</sub> N <sub>13</sub> O <sub>18</sub>                  | 1273.69              |
| 672/<br>674      | LVVNFESDKLKAVK            | C <sub>73</sub> H <sub>121</sub> N <sub>17</sub> O <sub>21</sub>                 | 1571.89              |
| 677              | AVKGFR                    | C <sub>31</sub> H <sub>49</sub> N <sub>9</sub> O <sub>7</sub>                    | 659.38               |
| Glutamine<br>No. | Sequence of PepQ          | Formula of the modification in<br>MaxQuant and Skyline <sup>a</sup>              | Modification<br>mass |
| 6                | PFPQPQLPY-NH <sub>2</sub> | C <sub>54</sub> H <sub>73</sub> N <sub>11</sub> O <sub>12</sub>                  | 1067.54              |

<sup>a</sup>Formula of TG2 peptide with NH<sub>3</sub> subtracted to account for the isopeptide bond
