# Supplementary material for: Comprehensive Detection of Isopeptides between Human Tissue Transglutaminase and Gluten Peptides
Source: Nutrients. 2019 Sep 20;11(10):2263. doi: 10.3390/nu11102263 (PMC6835481; doi:10.3390/nu11102263)
Supplement: Supplementary file 1 [file nutrients-11-02263-s001.zip]

Archive with 6 entries (6 files):
- supplM/isopeptides_fig_s1.pdf
- supplM/isopeptides_fig_s2.pdf
- supplM/isopeptides_fig_s3_new.pdf
- supplM/isopeptides_fig_s4.pdf
- supplM/isopeptides_tab_s1.pdf
- supplM/isopeptides_tab_s2.pdf
